1 **TITLE: Long reads from Nanopore sequencing as a tool for animal microbiome studies**

2  
3 Long reads in livestock microbiota

4

5

6  
7 **Beatriz Delgado<sup>1,2</sup>, Magdalena Serrano<sup>1</sup>, Carmen González<sup>1</sup>, Alex Bach<sup>3,4</sup>, and Oscar González-Recio<sup>1,2</sup>**

8 <sup>1</sup>Departamento de Mejora Genética Animal, Instituto Nacional de Investigación y Tecnología Agraria y Alimentaria, 28040 Madrid, Spain.

9 <sup>2</sup>Departamento de Producción Agraria, Escuela Técnica Superior de Ingeniería Agronómica, Alimentaria y de Biosistemas, Universidad Politécnica de  
10 Madrid, Ciudad Universitaria s/n, 28040 Madrid, Spain.

11 <sup>3</sup>Institució Catalana de Recerca i Estudis Avançats (ICREA), 08010 Barcelona, Spain

12 <sup>4</sup>Department of Ruminant Production, Institut de Recerca i Tecnologia Agroalimentàries (IRTA), 08140 Caldes de Montbui, Spain

13

14 Correspondence: Oscar González-Recio, Departamento de Mejora Genética Animal, Instituto Nacional de Investigación y Tecnología Agraria y  
15 Alimentaria, 28040 Madrid, Spain. Phone Number: (34) 913471486, [gonzalez.oscar@inia.es](mailto:gonzalez.oscar@inia.es)

16

17

18 **Abstract**

19

20 In the era of bioinformatics and metagenomics, the study of the ruminal microbiome has gained considerable  
21 relevance in the field of animal breeding, since the composition of the rumen microbiota significantly impacts  
22 production and the environment. Illumina sequencing is considered the gold standard for the analysis of  
23 microbiomes, but it is limited by obtaining only short DNA sequences to analyze. As an alternative, Oxford  
24 Nanopore Technologies (ONT) has developed a new sequencing technique based on nanopores that can be  
25 carried out in the MinION, a portable device with a low initial cost which long DNA readings can be obtained  
26 with. The aim of this study was to compare the performance of both types of sequencing applied to samples of  
27 ruminal content using a similar pipeline. The ONT sequencing provided similar results to the Illumina  
28 sequencing, although it was able to classify a greater number of readings at the species level, possibly due to  
29 the increase in the read size. The results also suggest that, due to the size of the reads, it would be possible to  
30 obtain the same amount of information in a smaller number of hours. However, detection of archaeal and  
31 eukaryotic species is still difficult to accomplish due to their low abundance in the rumen compared to  
32 bacteria, suggesting different pipelines and strategies are needed to obtain a whole representation of the less  
33 abundant species in the rumen microbiota.

34

35

36

## 37 **Background**

38

39 The bovine rumen has been studied for years in an attempt to reveal functions and microorganisms associated  
40 with nutritional features such as feed efficiency to use them in animal breeding programs for cattle (Knapp,  
41 Laur, Vadas, Weiss, & Tricarico, 2014). Lately, methane emissions from ruminants are among the main  
42 concerns in animal husbandry, given their contribution to global warming. Microbial cultures were essential  
43 for the first descriptions of the rumen content but they are usually hard to achieve (Creevey, Kelly,  
44 Henderson, & Leahy, 2014). Thanks to the Next Generation Sequencing (NGS) techniques it is now possible  
45 to detect different microbial taxa in rumen samples avoiding culture (Seshadri et al., 2018). This has allowed  
46 analyzing metagenomic samples in an easier way and to detect non-culturable microbes that broaden the  
47 knowledge of complex microbial communities as well as allow quantifying the relative abundances of each  
48 one of them in the community.

49

50 The sequencing by synthesis method utilized by the Illumina platform is currently widely used (Goodwin et  
51 al., 2016) and accepted as a gold standard because, among other, its high sequence accuracy. The nanopore  
52 sequencing developed by Oxford Nanopore Technologies (ONT) is an attractive technology due to the  
53 availability of small and portable devices currently possible at affordable costs (Lu, Giordano, & Ning, 2016).  
54 Combined with the diverse kits offered, the ONT is a versatile alternative that can be used for multiple  
55 purposes in microbiome studies. There are some publications comparing Illumina and nanopore sequencing  
56 (Shin et al., 2016), although most of them focus on 16s rRNA gene sequencing (Cusco et al., 2017; Ma,  
57 Stachler, & Bibby, 2017). These previous studies showed a promising potential of nanopore sequencing for  
58 species detection with a high correlation between the results obtained by Illumina and ONT at the phylum and  
59 genus levels, despite the smaller basecalling accuracy from ONT compared with Illumina. However, latest  
60 ONT technology and software developments provide consensus accuracies at genome assembly larger than  
61 99% (Wick, Judd, & Holt, 2019). Nanopore long reads are also being used to assembly whole genomes  
62 combining them with short reads for a better accuracy, and the number of microbiome studies using ONT is  
63 constantly growing. The clown anemofish, *Amphiprion ocellaris*, has been recently sequenced using hybrid  
64 assembly (Tan et al., 2018) as well as a multidrug-resistant COL1 strain (Xia et al., 2017), whose plasmids  
65 were also sequenced using short and long reads. This study also showed the ONT potential to make resistome  
66 profiles in municipal sewage, obtaining similar results as Illumina, although it was still necessary to improve  
67 the throughput of the sequencing runs. ONT has also been used to detected arbovirus in mosquitos (Batovska,  
68 Lynch, Rodoni, Sawbridge, & Cogan, 2017) obtaining comparable results to Illumina sequencing, despite the  
69 poorer quality of the reads was poorer. Other studies focus on the applicability of ONT for real-time viral  
70 pathogen detection (Greninger et al., 2015) in human blood as it shows similar results to Illumina but provides  
71 faster results, which is essential in the field of medicine. Moreover, analysis of the 16S rRNA gene is still  
72 preferred over shotgun metagenomics using the MinION and most of these studies have been conducted on  
73 mouse (Shin et al., 2016) and human gut microbiota (Leggett et al., 2017), proving consistent results for

74 individual taxonomic profiles. Other animal microbiomes have also been sequenced with the MinION, the dog  
75 skin microbiota was characterized using a mock community and dog skin samples to test new 16s rRNA  
76 primers, finding accurate taxonomic results at the genus level (Cusco et al., 2017).

77

78 There is a lack of publications comparing the performance of nanopore sequencing using shotgun sequencing  
79 rather than 16s rRNA gene sequencing applied to non-human microbiomes such as the rumen microbiota.  
80 Furthermore, to our knowledge, there are still no publications comparing ONT and Illumina to sequence  
81 rumen microbiota. Assessing the ONT performance in animal microbiota is relevant as there are several  
82 applications for animal husbandry. For instances, nutrition and breeding strategies are being developed to  
83 modulate the microbiome in several species (ref). It may be possible to use this technology to detect favorable  
84 or pathogen microbial profiles for economically and environmentally relevant traits.

85

86 Hence, the objective of this study was to evaluate the performance of ONT using the MinION (Oxford  
87 Nanopore Technology, Oxford, UK) device to sequence the rumen microbiota and compare the results with an  
88 Illumina MiSeq platform as benchmark in terms of reads yield, taxonomic assignment, and alpha and beta-  
89 diversity.

90

## 91 **2. Methods**

92

### 93 **2.1 Sample collection**

94 Rumen content (50  $\mu$ L) from 80 animals was extracted using a stomach tube connected to a mechanical  
95 pumping unit and was immediately frozen and stored at -80  $^{\circ}$ C to avoid microbial growth and to preserve the  
96 sample from degradation. Samples were later thawed and ground until solid and liquid phases were  
97 homogenized using a blender. DNA from 250  $\mu$ L of each sample was extracted using the “DNeasy Power Soil  
98 Kit” (QIAGEN, Valencia, CA, USA). DNA samples of 12 of those animals were selected for extreme  
99 phenotype of feed efficiency (FE), calculated as milk production (kg/d) divided by feed consumption (kg/d), 6  
100 for each type of phenotype of feed efficiency. Each sample was analyzed for quality measurement using a  
101 Nanodrop ND-1000 UV/Vis spectrophotometer (Nanodrop Technologies Inc., DE, USA), recording their  
102 260/280 and 260/230 ratios.

103

### 104 **2.2 DNA sequencing**

105 For Illumina sequencing, samples were diluted to a concentration of 5 ng/ $\mu$ L in a total volume of 15  
106  $\mu$ L/sample in a 96-well plate and were later sequenced using Illumina MiSeq in an external sequencing  
107 service (FISABIO, Valencia, Spain). The quality control was performed by the same sequencing service using  
108 the prinseq-lite program (Schmieder & Edwards, 2011) and the forward- and reverse-reads from the  
109 sequencing were joined using the FLASH software (Magoč & Salzberg, 2011).

110 The MinION device was used for ONT sequencing. The Ligation Sequencing Kit (SQK-LSK109 for 1D  
111 metabarcoding) was used for the library preparation as described by the manufacturer. Reads were basecalled  
112 and demultiplexed using Guppy ([community.nanoporetech.com](http://community.nanoporetech.com)). The resulting FASTQ files were used as  
113 input of Porechop (Wick R., 2017) for adaptor removal and barcode de-multiplexing. A total of 7,111,651  
114 paired reads were obtained from Illumina sequencing after the QC (Table 1). After the QC for ONT reads, a  
115 total of 2,927,404 good quality reads with an average length of 1,885 bp (Table 1) were retained and the  
116 distribution of the reads among the barcodes was homogeneous.  
117 Illumina sequence data are available from NCBI database, with bioproject number PRJNA423103. ONT  
118 sequences are available from the authors upon reasonable request.

119

120

### 121 **2.3 Data analysis**

122 The FASTQ files were aligned against the NCBI-nr protein database (Nov. 2017) using DIAMOND v0.9.22  
123 (blastx option) setting the -F option to 15, to consider frame-shift errors in the sequences and the -  
124 rangeCulling and -top options set to 10 to scan the whole sequence for alignments with a 10% of the best  
125 local bit score ([megan.informatik.uni-tuebingen.de](http://megan.informatik.uni-tuebingen.de), accessed on October 2018). The taxonomic binning of  
126 short reads from Illumina was performed using the daa2rma program from MEGAN Community Edition (CE)  
127 v6.11. with the option -a2t, to map the reads to the NCBI-taxonomy mapping file containing protein  
128 accessions (May 2017). Long reads from ONT were analyzed with specific parameters for long reads -lg (long  
129 reads) and -alg set to "longReads" (Huson et al., 2018). Relative taxonomic abundances were obtained for  
130 each samples and platform representing the number of reads assigned to each taxon. Relative abundances,  
131 alpha (Shannon and Simpson indexes) and beta diversity -using Bray-Curtis dissimilarity- were analyzed  
132 using the phyloseq (McMurdie & Holmes, 2013), vegan (Oksanen et al., 2019), and microbiome R (Leo Lahti  
133 et al., 2012-2019) packages.

134

### 135 **2.4 Assembly**

136 Short reads from the Illumina dataset were assembled using Megahit (Li, Liu, Luo, Sadakane, & Lam, 2015)  
137 with the default parameters using the joined forward and reverse reads. The nanopore reads were assembled  
138 using Canu (Koren et al., 2017) setting the options minReadLength = 100, minOverlapLength = 100 as the  
139 resulting reads were too short for the default parameters (less than 10,000 bp), and genomeSize = 2.5m, as  
140 described in the documentation for metagenome assemblies. The quality of the assemblies was assessed using  
141 Quast v4.0 (Mikheenko, Valin, Prjibelski, Saveliev, & Gurevich, 2016).

142

143

144

145

146

147 **3. Results**

148

149 **3.1 Rarefaction curves**

150 Nanopore sequencing had a low throughput in terms of number of reads when compared with Illumina due to  
151 the sequencing technology itself. On the other hand, ONT sequencing obtained longer reads as opposed to  
152 Illumina. However, rarefaction curves showed that intra-sample diversity was well represented for both  
153 technologies (Supplementary Figure 1), suggesting that a low number of reads from nanopore sequencing is  
154 enough to represent the microbial complexity in rumen samples. The 48-h sequencing runs in the MinION  
155 could be shortened, thus allowing an even faster analysis.

156

157 **3.2 Alpha diversity**

158 Alpha-diversity indexes -Shannon and Simpson- showed a high similarity for each sample in both sequencing  
159 datasets, although samples ranked slightly different between platforms (Figure 1). However, the average  
160 indexes by platform are highly similar for both the Illumina and ONT datasets -3.20 and 3.30 for the Shannon  
161 index respectively, and 0.912 and 0.918 for the Simpson index. The platform effect was not significant  
162 ( $P>0.05$ ) when it was included in a generalized linear model with Shannon or Simpson diversity indices as  
163 dependent variable, and parity and platform as explanatory effects.

164

165

166 **3.3 Beta diversity**

167 Nanopore and Illumina sequencing also delivered similar results for microbial composition and abundance at  
168 all taxonomic levels, although the nanopore dataset detected a slightly greater diversity (Table 1). Nanopore  
169 sequencing seems to detect a greater ecological diversity in the samples at lower taxonomic levels (e.g.  
170 species and genera). Longer reads allow DIAMOND and MEGAN assigning more sequences to the reference  
171 database as they rely on sequence similarity, and it is more likely to match a read to a species when using  
172 longer reads. Both platforms display similar results at upper taxonomic levels -phylum, family and genus- as  
173 shown by the similar distribution found in the ordination plots, despite the differences in the number of reads.  
174 Inter-sample relative abundances are similar for both sequencing techniques although there were some  
175 differences between MinION and Illumina datasets. These differences are greater at the species level and  
176 seem to affect sample distribution between both sequencing platforms, meaning the relative abundances of the  
177 same sample differ for the different platforms.

178

179

180 **3.4 Relative abundances**

181 Bacteria, Archaea and Eukarya kingdoms were detected in the expected ratios, with Bacteria being the most  
182 abundant taxonomic kingdom. Illumina reads were grouped in 125 species, 78 genera and 17 phyla (Table 1),  
183 whereas a larger number of groups were detected from ONT reads: 146 species, 86 genera and 21 phyla.

184 Relative abundances for common taxa were similar, although the MinION detected a greater abundance of the  
185 phylum Firmicutes (Figure 3) while maintaining the abundances of other taxa such as Bacteroidetes, which  
186 also affects the Bacteroidetes/Firmicutes ratio of each sample (Table 2, Supplementary Figure 2), creating  
187 high discrepancies in samples such as number 2631 and 3404. Moreover, a higher diversity was detected with  
188 longer reads, since 95 Firmicutes species and 50 Bacteroidetes species could be classified with ONT, whereas  
189 when using Illumina reads only yield 72 Firmicutes and 39 Bacteroidetes species respectively could be  
190 classified. ONT classified 16% of reads to species level, 2 percentual points larger than Illumina. For  
191 comparison, the Bacteroidetes/Firmicutes ratio was analyzed from 16S Illumina sequences (V3-V4 regions).  
192 Clear differences were observed in this ratio between Illumina shotgun and Illumina 16S amplicon sequencing  
193 (Supplementary Figure 2). The Bacteroidetes/Firmicutes ratio from ONT sequencing overlapped with both  
194 Illumina strategies.

195

### 196 **3.5 Assembly**

197 Assembly of long and short reads was performed to test the ability of nanopore reads to assembly longer  
198 contigs. The assembly of the MinION reads provided a lower number of contigs (281 contigs) compared to  
199 the Illumina assembly (7856 contigs), while also having a higher N50 (see Table 3). The total length of the  
200 assembly is different -Illumina almost doubles Nanopore's- which complicates the comparison in terms in the  
201 information each assembly provides, but this can be mainly caused by the difference in the number of reads  
202 provided by each platform. However, the higher N50 and the low number of contigs from ONT indicate that  
203 long reads outperform short reads in metagenomic assemblies, also allowing the assembly of ultra-long  
204 contigs -49,178 bp was the longest contigs in the nanopore assembly while Illumina's longest contig was only  
205 11,173 bp. Sequencing depth with Illumina MiSeq does not seem to be large enough to obtain an assembly  
206 with enough quality.

207

### 208 **4. Discussion**

209

210 Relative abundance results for common taxa to both platforms were consistent with the previous analyses,  
211 finding a high similarity between the two platforms, although the MinION detected a greater abundance of the  
212 phylum Firmicutes (Figure 3) while maintaining the abundances of other taxa. Members of the phylum  
213 Bacteroidetes have been described as highly efficient polysaccharide degraders due to large genomic regions  
214 specialized in this processes (Seshadri et al., 2018) whereas members of Firmicutes are considered  
215 "nutritionally fastidious" as they have lost most of their degradative enzymes and feed on fermentation  
216 products produced by other microbes. Moreover, the Bacteroidetes/Firmicutes (B/F) ratio has been associated  
217 with obesity in some human and mice gut microbiota studies (Koliada et al., 2017), emphasizing that high  
218 ratios are related to a higher body mass index (BMI). Obtaining accurate B/F ratios could be key to analyze  
219 the relationship between the rumen microbiota composition and relevant phenotypic traits and more efforts are  
220 needed to sequence these microbes using nanopore technologies. Other studies in dairy cattle showed that this

221 ratio was strongly associated with milk-fat yield (Jami, White, & Mizrahi, 2014) and suggest that these two  
222 phyla could also be related to different feed efficiency parameters such as the dry matter intake (DMI) and  
223 residual feed intake (RFI). *Prevotella* spp. -which belongs to Bacteroidetes- has been associated to feed  
224 efficiency (Jewell, McCormick, Odt, Weimer, & Suen, 2015; Bach et al., 2019), although most of these results  
225 were not consistent due to the low taxonomic resolution of 16S rRNA gene sequencing. Species among this  
226 genus are involved in central rumen processes such as pectin and xyloglucan degradation and acetate  
227 production (Seshadri et al., 2018), which have a high impact on the nutrition of ruminants. Some previous  
228 studies showed that *Prevotella bryantii* -also detected by the two platforms- has some relationship with feed  
229 efficiency (Elolimy, Arroyo, Batistel, Iakiviak, & Loor, 2018). The similarities observed for the principal  
230 taxonomic groups imply that ONT reads could be used in association analyses to correlate the microbiome  
231 composition to phenotypic traits such as feed efficiency. A correlation analysis between the rumen  
232 microbiome and feed efficiency has already been performed using Illumina reads, where significant  
233 correlations between a high feed efficiency were found when the microbiome composition had a high  
234 abundance of Bacteroidetes and a low abundance of archaea (Delgado et al., 2019), which the current study  
235 found in almost the same proportion in both datasets. Moreover, the higher number of species classified by  
236 long reads indicates that it is likely that nanopore reads are also suitable for other applications such as  
237 pathogen detection in cattle since its higher species resolution.

238

239 The overall diversity of methanogens assigned by the ONT reads was low, detecting only two species  
240 belonging to the genus *Methanobrevibacter*. The species *M. millerae* was the only common species between  
241 the two platforms, while the Illumina reads also included other important species such as *M. ruminantium* and  
242 *M. olleyae*. *Methanobrevibacter* spp. In addition, relevant ciliates appear in similar proportions in both  
243 datasets, such as *Entodinium caudatum*, *Tetrahymena thermophila*, *Paramecium tetraurelia* and *Oxytricha*  
244 *trifallax*, although the presence of these microorganisms was not consistent since some samples had no  
245 eukaryotic representatives, which happened both in the ONT and the Illumina dataset. The low detection of  
246 important archaeal species such as *M. ruminantium* and *M. olleyae* are one of the most relevant differences  
247 between the two platforms. *Methanobrevibacter* spp. is usually the main methanogens in rumen samples and  
248 several studies are consistent in the presence of *M. millerae* -which was found in both datasets- and *M.*  
249 *ruminantium* (Chaucheyras-Durand & Ossa, 2014). Moreover, the rumen methanogen *M. millerae* M9 has  
250 been shown to have more copies of methanogenesis-related genes (Kelly et al., 2016) and some members of  
251 the class Thermoplasmata -also detected by the Illumina reads- have been proposed as a target for methane  
252 reduction (Poulsen et al., 2013) as they are methylotrophic and do not require hydrogen to synthesize  
253 methane. The ciliates detected by both platforms -*Entodinium caudatum*, *Tetrahymena thermophila*,  
254 *Paramecium tetraurelia* and *Oxytricha trifallax*-, are also commonly found in the rumen microbiome  
255 (Newbold, De la Fuente, Belanche, Ramos-Morales, & McEwan, 2015). Ciliates and methanogens are usually  
256 symbionts and are involved in methane production, although only methanogens produce methane (Newbold et  
257 al., 2015). Members of Ciliophora have more hydrogenosomes than other protozoa and are believed to have

258 more endosymbiotic methanogens than other protozoa and to produce a greater impact on methanogenesis  
259 (Newbold et al., 2015). However, presence of eukaryotic microorganisms was not detected in some samples,  
260 which can be due to the low abundance of this species, compared with bacteria in the rumen microbiota or due  
261 to sensitivity issues in the pipeline. These results suggest that the taxonomic classification is comparable to  
262 that of Illumina at the phylum, family and genus levels, although long reads can be useful for species  
263 detection (e.g. pathogen detection). More sensitive procedures, such as amplicon or operon sequencing, may  
264 be necessary for a better detection of low abundant microorganisms. Increasing the sequencing depth could  
265 also be useful to detect a higher number of non-abundant species (Sims, Sudbery, Ilott, Heger, & Ponting,  
266 2014) such as archaea and eukaryotes in rumen samples. Better extraction methods that avoid DNA  
267 fragmentation may improve the number of long-DNA molecules that are recovered from the samples, which  
268 also allows a better nanopore sequencing.

269 Assembly of metagenomic data is the best strategy to recover genomes from the data, while non-assembly  
270 strategies are usually better to analyze microbiome profiles. Moreover, assemblies are useful for functional  
271 profiling and for connecting relevant metabolic pathways to their corresponding microbes and for discovering  
272 and characterizing important species. Although this study suggests that nanopore sequencing outperforms  
273 short-read assemblies for more accuracy in the final assemblies, a combination of both types of reads is  
274 usually the best way to obtain high quality genomes (Tan et al., 2018), as Illumina's short reads are usually  
275 highly accurate. However, nanopore reads are expected to reach the same accuracies as new bioinformatic  
276 tools are being developed so high-quality assemblies could be obtained using only nanopore reads, although  
277 the sequencing depth plays an important role in the quality of the assemblies, and it should be increased to  
278 obtain better results. The average size of the reads obtained by the MinION must be longer for better  
279 assemblies, as they would cover larger parts of the genomes. For that, the protocols for DNA extraction  
280 should be improved to avoid shearing the microbial DNA.

281  
282 Classical approaches for modulating the microbiome include management practices and food additives,  
283 genetic selection is the principal strategy to obtain animals with improved phenotypic traits (Tapio, Snelling,  
284 Strozzi, & Wallace, 2017). It has been suggested that the microbial composition in ruminants could be used as  
285 a predictor of complex traits (Gonzalez-Recio, Zubiria, García-Rodríguez, Hurtado, & Atxaerandio, 2018), as  
286 there are signs of host genetic control over the microbiome composition in cows, which could lead to animal  
287 breeding programs that select animals with a favorable microbiome for a high feed efficiency phenotype  
288 (Sasson et al., 2017). Thus, selecting animals with less methane production could lead to a decrease in the  
289 overall impact of livestock in our environment.

290  
291

## 292 **Conclusions**

293 Illumina sequencing is the most used sequencing technology for shotgun metagenomics as it has a high  
294 sequencing depth and accuracy, but the short length of the reads makes it difficult to assign specific taxa or



295 genes without a previous assembly. Nanopore sequencing provides long reads that could cover larger genome  
296 regions allowing more accurate assemblies. However, long reads involve greater computational efforts. Here  
297 we used DIAMOND and MEGAN tools which can work with long reads. Our analyses suggest that ONT  
298 sequencing provide an interesting alternative for microbiome profiling in rumen samples following this  
299 protocol. The microbiome compositions determined using the two technologies are similar, especially at the  
300 phylum and family levels, although a larger number of taxonomic groups is detected when using longer reads.  
301 Both platforms provide similar beta-diversity between sequenced samples. The ONT sequencing provides an  
302 easier approach to microbiome profiling for almost all kind of laboratories due to its small size, flexibility,  
303 and relative low cost. The ONT could even be used in the field to analyze microbiome profiles in real time  
304 and provide quick results that may be used for diagnostic or phenotyping purposes.

305

306

### 307 **Bibliography**

308

- 309 Bach, A., Lopez-Garcia, A., Gonzalez-Recio, O., Elcoso, G., Fàbregas, F., Chaucheyras-Durand, F., & Castex  
310 M. (2019). Changes in the rumen and colon microbiota and effects of live yeast dietary supplementation  
311 during the transition from the dry period to lactation of dairy cows. *Journal of Dairy Science*, *102*(7):  
312 6180-6198. <https://doi.org/10.3168/jds.2018-16105>
- 313 Batovska, J., Lynch, S. E., Rodoni, B. C., Sawbridge, T. I., & Cogan, N. O. (2017). Metagenomic arbovirus  
314 detection using MinION nanopore sequencing. *Journal of Virological Methods*, *249*(September), 79–84.  
315 <https://doi.org/10.1016/j.jviromet.2017.08.019>
- 316 Chaucheyras-Durand, F., & Ossa, F. (2014). The rumen microbiome : abundance , diversity , and new  
317 investigative tools. *The Professional Animal Scientist*, *30*, 1–12.  
318 [https://doi.org/http://dx.doi.org/10.15232/S1080-7446\(15\)30076-0](https://doi.org/http://dx.doi.org/10.15232/S1080-7446(15)30076-0)
- 319 Creevey, C. J., Kelly, W. J., Henderson, G., & Leahy, S. C. (2014). Determining the culturability of the rumen  
320 bacterial microbiome. *Microbial Biotechnology*, *7*(5), 467–479. [https://doi.org/10.1111/1751-](https://doi.org/10.1111/1751-7915.12141)  
321 7915.12141
- 322 Cusco, A., Vines, J., D'Andreano, S., Riva, F., Casellas, J., Sanchez, A., & Francino, O. (2017). Using  
323 MinION to characterize dog skin microbiota through full-length 16S rRNA gene sequencing approach.  
324 *BioRxiv*, 167015. <https://doi.org/10.1101/167015>
- 325 Delgado, B., Bach, A., Guasch, I., González, C., Elcoso, G., Pryce, J. E., & Gonzalez-Recio, O. (2019).  
326 Whole rumen metagenome sequencing allows classifying and predicting feed efficiency and intake  
327 levels in cattle. *Scientific Reports*, *9*(1). <https://doi.org/10.1038/s41598-018-36673-w>
- 328 Elolimy, A. A., Arroyo, J. M., Batistel, F., Iakiviak, M. A., & Loor, J. J. (n.d.). *Association of residual feed*  
329 *intake with abundance of ruminal bacteria and biopolymer hydrolyzing enzyme activities during the*  
330 *peripartal period and early lactation in Holstein dairy cows*. <https://doi.org/10.1186/s40104-018-0258-9>
- 331 Gonzalez-Recio, O., Zubiria, I., García-Rodríguez, A., Hurtado, A., & Atxaerandio, R. (2018). <em>Short

- 332 communication: Signs of host genetic regulation in the microbiome composition in 2 dairy breeds:  
333 Holstein and Brown Swiss. *Journal of Dairy Science*, 101(3), 2285–2292.  
334 <https://doi.org/10.3168/jds.2017-13179>
- 335 Goodwin, S., McPherson, J. D., & McCombie, W. R. (2016). Coming of age: Ten years of next-generation  
336 sequencing technologies. *Nature Reviews Genetics*, 17(6), 333–351. <https://doi.org/10.1038/nrg.2016.49>
- 337 Greninger, A. L., Naccache, S. N., Federman, S., Yu, G., Mbala, P., Bres, V., ... Chiu, C. Y. (2015). Rapid  
338 metagenomic identification of viral pathogens in clinical samples by real-time nanopore sequencing  
339 analysis. *Genome Medicine*. <https://doi.org/10.1186/s13073-015-0220-9>
- 340 Huson, D. H., Albrecht, B., Bağci, C., Bessarab, I., Górska, A., Jolic, D., & Williams, R. B. H. (2018).  
341 MEGAN-LR: New algorithms allow accurate binning and easy interactive exploration of metagenomic  
342 long reads and contigs. *Biology Direct*. <https://doi.org/10.1186/s13062-018-0208-7>
- 343 Jami, E., White, B. A., & Mizrahi, I. (2014). Potential role of the bovine rumen microbiome in modulating  
344 milk composition and feed efficiency. *PLoS ONE*, 9(1). <https://doi.org/10.1371/journal.pone.0085423>
- 345 Jewell, K. A., McCormick, C. A., Odt, C. L., Weimer, P. J., & Suen, G. (2015). Ruminant bacterial community  
346 composition in dairy cows is dynamic over the course of two lactations and correlates with feed  
347 efficiency. *Applied and Environmental Microbiology*. <https://doi.org/10.1128/AEM.00720-15>
- 348 Kelly, W. J., Pacheco, D. M., Li, D., Attwood, G. T., Altermann, E., & Leahy, S. C. (2016). The complete  
349 genome sequence of the rumen methanogen *Methanobrevibacter millerae* SM9. *Standards in Genomic  
350 Sciences*. <https://doi.org/10.1186/s40793-016-0171-9>
- 351 Knapp, J. R., Laur, G. L., Vadas, P. A., Weiss, W. P., & Tricarico, J. M. (2014). Invited review: Enteric  
352 methane in dairy cattle production: Quantifying the opportunities and impact of reducing emissions.  
353 *Journal of Dairy Science*. <https://doi.org/10.3168/jds.2013-7234>
- 354 Koliada, A., Syzenko, G., Moseiko, V., Budovska, L., Puchkov, K., Perederiy, V., ... Vaiserman, A. (2017).  
355 Association between body mass index and Firmicutes/Bacteroidetes ratio in an adult Ukrainian  
356 population. *BMC Microbiology*. <https://doi.org/10.1186/s12866-017-1027-1>
- 357 Koren, S., Walenz, B. P., Berlin, K., Miller, J. R., Bergman, N. H., & Phillippy, A. M. (2017). Canu: scalable  
358 and accurate long-read assembly via adaptive k-mer weighting and repeat separation. *Genome Research*,  
359 27(5), 722–736. <https://doi.org/10.1101/gr.215087.116>
- 360 Leggett, R. M., Alcon-Giner, C., Heavens, D., Caim, S., Brook, T. C., Kujawska, M., ... Clark, M. D. (2017).  
361 Rapid MinION metagenomic profiling of the preterm infant gut microbiota to aid in pathogen  
362 diagnostics. *Bioarxiv*, 180406. <https://doi.org/10.1101/180406>
- 363 Leo Lahti and Sudarshan Shetty. (n.d.). *microbiome R package*. Retrieved from <http://microbiome.github.io>
- 364 Li, D., Liu, C. M., Luo, R., Sadakane, K., & Lam, T. W. (2015). MEGAHIT: An ultra-fast single-node  
365 solution for large and complex metagenomics assembly via succinct de Bruijn graph. *Bioinformatics*,  
366 31(10), 1674–1676. <https://doi.org/10.1093/bioinformatics/btv033>
- 367 Lu, H., Giordano, F., & Ning, Z. (2016). Oxford Nanopore MinION Sequencing and Genome Assembly.  
368 *Genomics, Proteomics and Bioinformatics*. <https://doi.org/10.1016/j.gpb.2016.05.004>

- 369 Ma, X., Stachler, E., & Bibby, K. (2017). Evaluation of Oxford Nanopore MinION Sequencing for 16S rRNA  
370 Microbiome Characterization. *BioRxiv*, 1–19. <https://doi.org/10.1101/099960>
- 371 Magoč, T., & Salzberg, S. L. (2011). FLASH: fast length adjustment of short reads to improve genome  
372 assemblies. *Bioinformatics*, 27(21), 2957–2963. Retrieved from  
373 <http://dx.doi.org/10.1093/bioinformatics/btr507>
- 374 McMurdie, P. J., & Holmes, S. (2013). Phyloseq: An R Package for Reproducible Interactive Analysis and  
375 Graphics of Microbiome Census Data. *PLoS ONE*, 8(4). <https://doi.org/10.1371/journal.pone.0061217>
- 376 Mikheenko, A., Valin, G., Prjibelski, A., Saveliev, V., & Gurevich, A. (2016). Icarus: Visualizer for de novo  
377 assembly evaluation. *Bioinformatics*, 32(21), 3321–3323. <https://doi.org/10.1093/bioinformatics/btw379>
- 378 Newbold, C. J., De la Fuente, G., Belanche, A., Ramos-Morales, E., & McEwan, N. R. (2015). The role of  
379 ciliate protozoa in the rumen. *Frontiers in Microbiology*. <https://doi.org/10.3389/fmicb.2015.01313>
- 380 Oksanen, A. J., Blanchet, F. G., Friendly, M., Kindt, R., Legendre, P., Mcglinn, D., ... Szoecs, E. (2019).  
381 *Package 'vegan.'*
- 382 Poulsen, M., Schwab, C., Borg Jensen, B., Engberg, R. M., Spang, A., Canibe, N., ... Urich, T. (2013).  
383 Methylotrophic methanogenic Thermoplasmata implicated in reduced methane emissions from bovine  
384 rumen. *Nature Communications*. <https://doi.org/10.1038/ncomms2432>
- 385 Sasson, G., Kruger Ben-Shabat, S., Seroussi, E., Doron-Faigenboim, A., Shterzer, N., Yaacoby, S., ...  
386 Mizrahi, I. (2017). Heritable Bovine Rumen Bacteria Are Phylogenetically Related and Correlated with  
387 the Cow's Capacity To Harvest Energy from Its Feed. *MBio*, 8(4). Retrieved from  
388 <http://mbio.asm.org/content/8/4/e00703-17.abstract>
- 389 Schmieder, R., & Edwards, R. (2011). Quality control and preprocessing of metagenomic datasets.  
390 *Bioinformatics*, 27(6), 863–864. Retrieved from <http://dx.doi.org/10.1093/bioinformatics/btr026>
- 391 Seshadri, R., Leahy, S. C., Attwood, G. T., Teh, K. H., Lambie, S. C., Cookson, A. L., ... Cerón Cucchi, M.  
392 (2018). Cultivation and sequencing of rumen microbiome members from the Hungate1000 Collection.  
393 *Nature Biotechnology*. <https://doi.org/10.1038/nbt.4110>
- 394 Shin, J., Lee, S., Go, M. J., Lee, S. Y., Kim, S. C., Lee, C. H., & Cho, B. K. (2016). Analysis of the mouse gut  
395 microbiome using full-length 16S rRNA amplicon sequencing. *Scientific Reports*.  
396 <https://doi.org/10.1038/srep29681>
- 397 Sims, D., Sudbery, I., Ilott, N. E., Heger, A., & Ponting, C. P. (2014). Sequencing depth and coverage: Key  
398 considerations in genomic analyses. *Nature Reviews Genetics*, 15(2), 121–132.  
399 <https://doi.org/10.1038/nrg3642>
- 400 Tan, M. H., Austin, C. M., Hammer, M. P., Lee, Y. P., Croft, L. J., & Gan, H. M. (2018). Finding Nemo:  
401 Hybrid assembly with Oxford Nanopore and Illumina reads greatly improves the clownfish (*Amphiprion*  
402 *ocellaris*) genome assembly. *GigaScience*, 7(3), 1–6. <https://doi.org/10.1093/gigascience/gix137>
- 403 Tapio, I., Snelling, T. J., Strozzi, F., & Wallace, R. J. (2017). The ruminal microbiome associated with  
404 methane emissions from ruminant livestock. *Journal of Animal Science and Biotechnology*, 8(1), 1–11.  
405 <https://doi.org/10.1186/s40104-017-0141-0>

- 406 Wick R. (n.d.). *Porechop*. Retrieved from <https://github.com/rrwick/Porechop>
- 407 Wick, R. R., Judd, L. M., & Holt, K. E. (2019). Performance of neural network basecalling tools for Oxford  
408 Nanopore sequencing. *BioRxiv*, 543439. <https://doi.org/10.1101/543439>
- 409 Xia, Y., Li, A. D., Deng, Y., Jiang, X. T., Li, L. G., & Zhang, T. (2017). MinION Nanopore sequencing  
410 enables correlation between resistome phenotype and genotype of coliform bacteria in municipal  
411 sewage. *Frontiers in Microbiology*, 8(OCT), 1–13. <https://doi.org/10.3389/fmicb.2017.02105>
- 412
- 413

414

415 **Table 1. Summary of Illumina and Nanopore sequencing performance and analysis results.**

| Sample                  | Illumina reads | Nanopore reads |
|-------------------------|----------------|----------------|
| 1147                    | 763,635        | 242,794        |
| 1149                    | 614,876        | 268,196        |
| 678                     | 580,763        | 221,340        |
| 17246                   | 519,271        | 229,538        |
| 2631                    | 836,541        | 245,231        |
| 152                     | 425,134        | 272,455        |
| 8172                    | 501,871        | 204,676        |
| 8627                    | 784,286        | 273,294        |
| 9524                    | 575,278        | 307,658        |
| 8815                    | 508,088        | 269,539        |
| 3404                    | 534,667        | 147,489        |
| 2954                    | 467,241        | 245,194        |
| TOTAL reads             | 7,111,651      | 2,927,404      |
| Total yield             | 2.13 Gb        | 5.48 Gb        |
| <i>Species</i>          | 125            | 146            |
| <i>Genera</i>           | 78             | 86             |
| <i>Phyla</i>            | 17             | 21             |
| <i>Read length (pb)</i> | 2 x 300        | ≈1,885         |

416

417

418 **Table 2. Ratio Bacteroidetes/Firmicutes in both datasets**

| Sample | MinION ratio | Illumina ratio |
|--------|--------------|----------------|
| 2631   | 0.34476036   | 2.34547541     |
| 2954   | 1.77699134   | 2.3289202      |
| 3404   | 0.74890076   | 2.16387852     |
| 678    | 2.20379843   | 3.27502731     |
| 8172   | 2.38623769   | 2.91414699     |
| 8627   | 0.85845545   | 1.74129358     |

|       |            |            |
|-------|------------|------------|
| 8815  | 1.30866685 | 2.37871471 |
| 9524  | 1.68766111 | 2.39366088 |
| 1147  | 1.48723686 | 1.89157119 |
| 1149  | 2.74632061 | 2.41265928 |
| 152   | 2.77646755 | 3.15533655 |
| 17246 | 1.97668826 | 1.13413476 |

419

420

421 **Table 3. Assembly statistics**

|                     | Illumina assembly | MinION assembly |
|---------------------|-------------------|-----------------|
| Length (bp)         | 5,296,436         | 2,550,082       |
| GC (%)              | 47.7              | 46.89           |
| N's                 | 0                 | 0               |
| N50                 | 641               | 11,549          |
| Largest Contig (bp) | 11,173            | 49,178          |
| Contigs             | 7,856             | 281             |

422

423

424

425 **Figure 1. Comparison of alpha diversity indexes.** Shannon (left) and Simpson (right) indexes were calculated for each  
426 sample and sequencing technology to compare the overall taxonomic diversity.

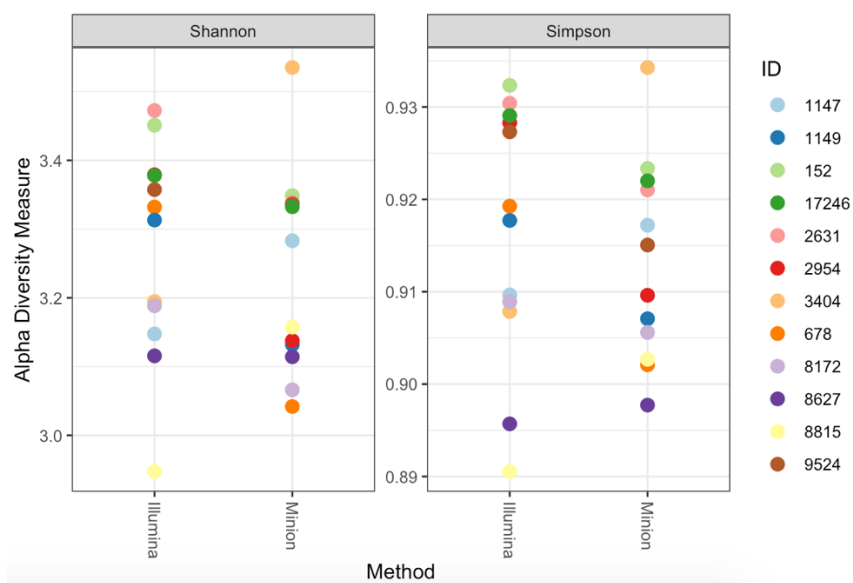

427

428

429

430

431

432 **Figure 1. Comparison of relative abundances of common taxa at four different taxonomic levels using Illumina and**  
 433 **MinION sequencers. Relative abundances are similar for common taxa at all levels, although the phylum Firmicutes has**  
 434 **a higher relative abundance in the MinION dataset which counts for most of the observed differences in the four**  
 435 **graphics.**  
 436

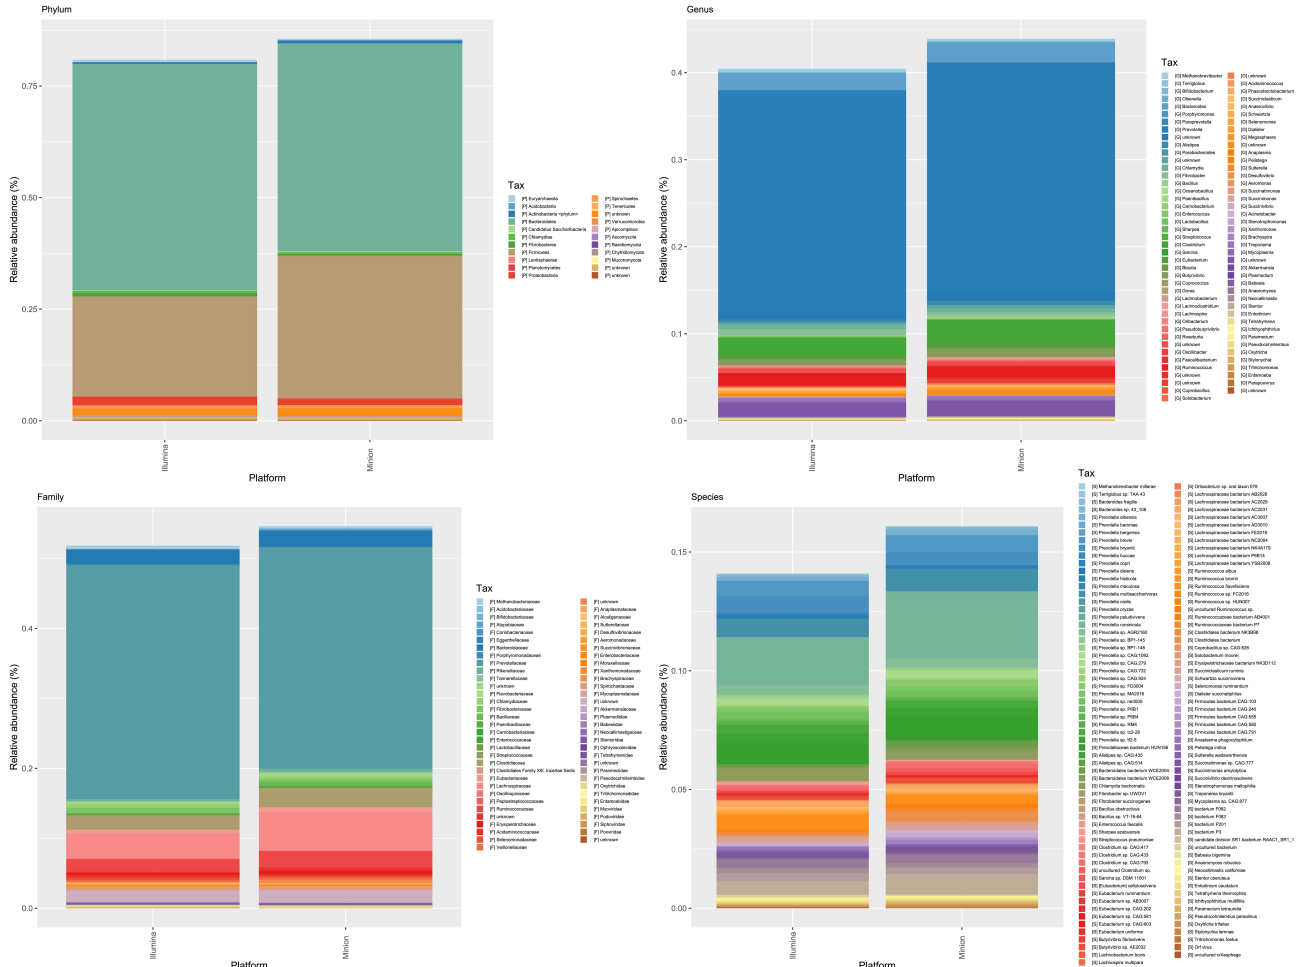

437  
 438



439 **Figure 3. Ordination plots corresponding to four different taxonomic levels.** Ordination analysis was performed  
440 using data corresponding to relative abundances for both sequencing techniques at different taxonomic levels: phylum,  
441 family, genus and species. For the phylum, family and genus levels two different clusters can be observed corresponding  
442 to the different sequencing techniques, although sample distribution is similar in both types of sequencing. At the species  
443 level no obvious clusters can be observed.

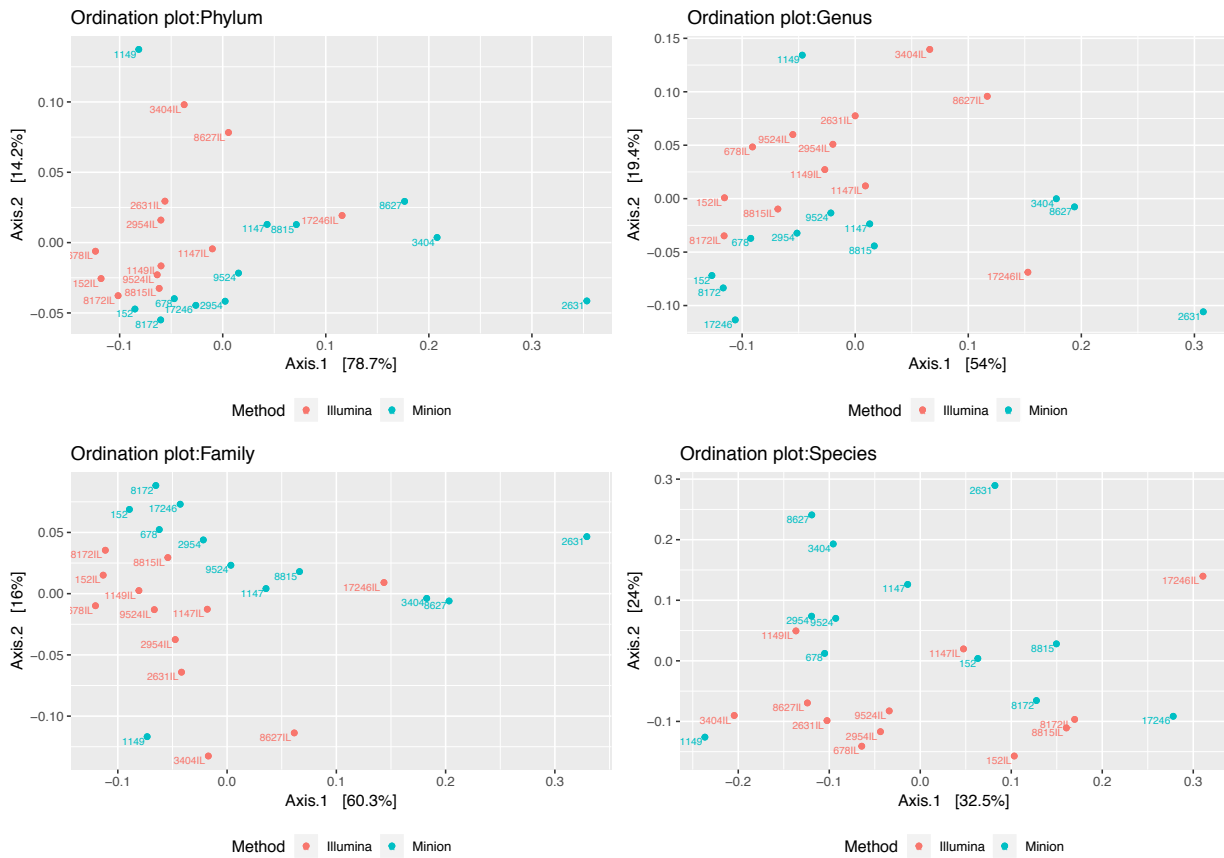

444

445

446

447 **Supplementary Figures**

448

449 Supplementary figure 1. Rarefaction curves of the 12 samples for both sequencing techniques.

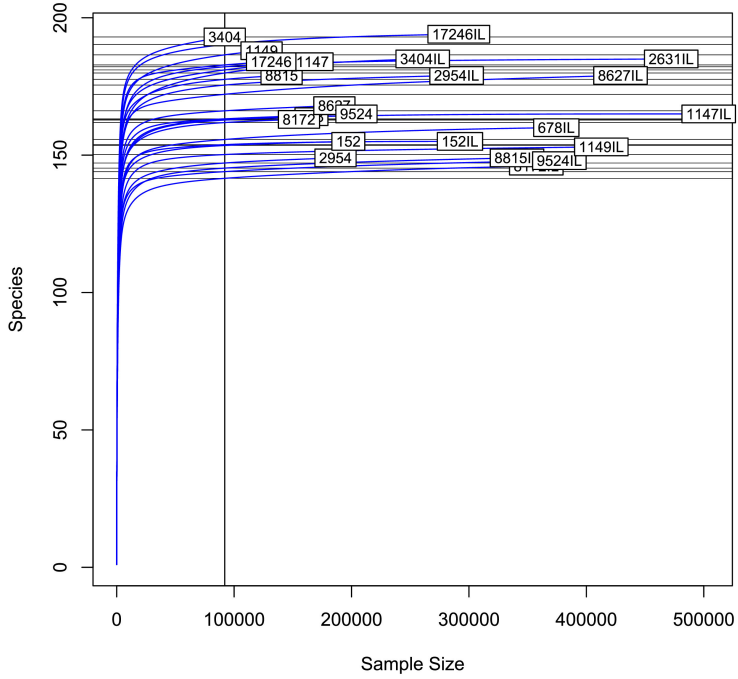

450

451

452

453 Supplementary figure 2. Average ratio Bacteroidetes/Firmicutes per platform.

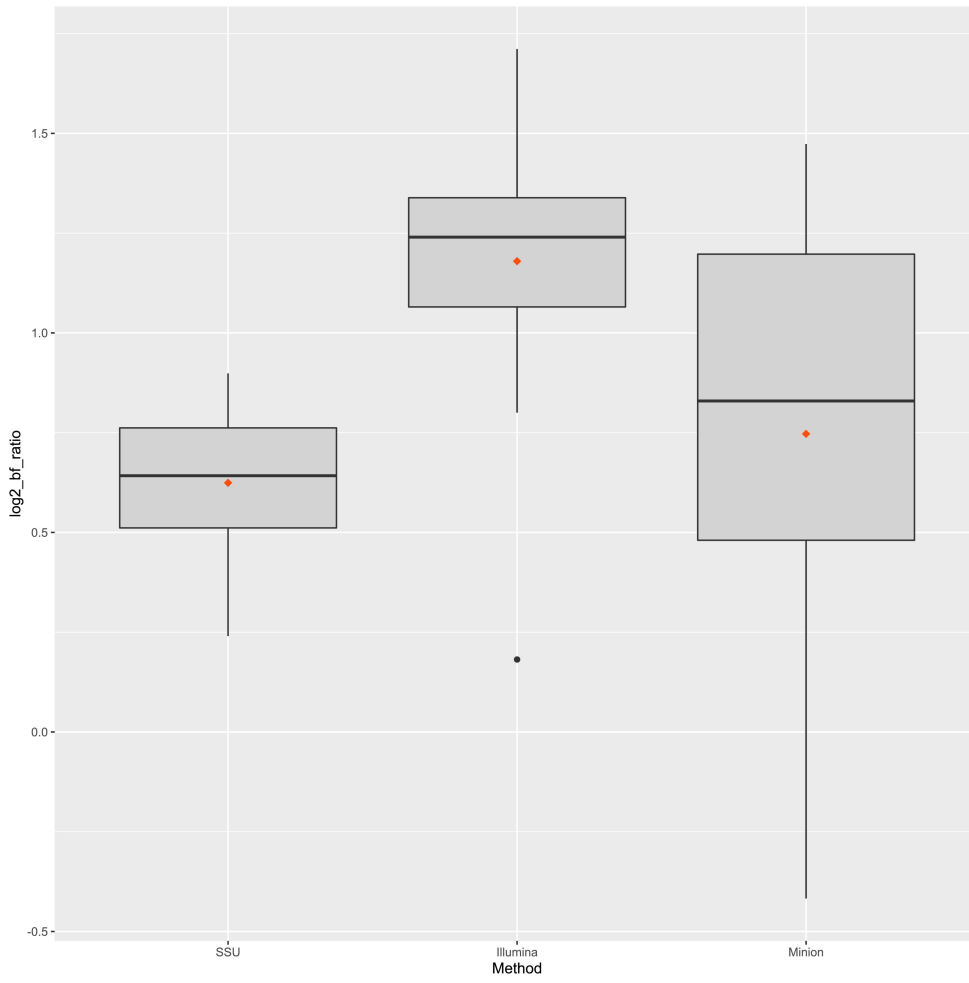

454
